# Supplementary material
Source: MDPI journal article supplement (https://www.mdpi.com/2071-1050/15/6/5021)
Supplement: s1 [file s1 › S1.pdf]

## Supplementary material (S1) - Ecologically-based landscape and foodshed planning

Supplementary Material S1 provides additional information regarding the first stage of the methodological approach. At this stage, we applied an ecologically-based landscape and foodshed planning to propose a potential foodshed relocation scenario for the EDM. Here we present detailed information on the ecological suitability assessment, along with clarification concerning the classification criteria for grouping COS18 classes; the complementary scenarios obtained for each specific agrarian use (i.e., temporary crops, permanent crops, pastures and multiple agrosilvopastoral use); and the complete list of the database used.

### 1. Ecological suitability assessment

The ecological suitability (ES) was determined according to the Multi-Criteria Decision Analysis approach (MCDA) developed by Cardoso et al. [1]. This approach allowed the assessment of three ecological criteria simultaneously, namely, the soil ecological value (ev) [2], the terrain morphology (tm) [3] and the slope [4]. To this end, we used the weighted overlay tool (Spatial Analyst) by assigning weight factors to each criterion and a value scale from 1 to 5 to the different classes of each criterion, according to the following equation and table (Table S1a):

$$ES = (0,65 \times ev) + (0,20 \times slope) + (0,15 \times tm), \quad (1)$$

**Table S1a.** Criteria, classes and weight factors assigned to the ecological suitability multicriteria analysis.

| Factors               |            |     |            |            |           |               |              | Weight (%) |
|-----------------------|------------|-----|------------|------------|-----------|---------------|--------------|------------|
| Soil ecological value | Very low   | Low | Variable   | High       | Very high |               |              | 65         |
| Class weight (1-5)    | 1          | 2   | 3          | 4          | 5         |               |              |            |
| Slope (%)             | 0-3        | 3-5 | 5-8        | 8-12       | 12-16     | 16-25         | >25          | 20         |
| Class weight (1-5)    | 5          | 5   | 4          | 3          | 3         | 2             | 1            |            |
| Land morphology       | Hillcrests |     | Wet System | Hillslopes | Wet areas | Coastal areas | Water bodies | 15         |
| Class weight (1-5)    | 4          |     | 5          | 3          | 0         | 0             | 0            |            |

<sup>1</sup> Source: adapted from Cardoso et al. [1]

### 2. Agrarian use potential planning and ecological adequacy of land use

Following the land suitability mapping of the territory, we aimed to select ecologically suitable areas for agrarian land uses. To accomplish this task, we needed to establish the conditions for the land use potential planning and assess the ecological adequacy regarding the current land occupation in 2018. Therefore, it was required to rearrange and rename the classes of the land cover map for 2018 (COS2018), to ease the intended analysis (Table S1b.)

**Table S1b.** COS2018 level 1, 2 and 3 nomenclature and reclassification.

| COS level 1                              | COS level 2                              | COS level 3                                                                                                      | COS reclassified                                                            |
|------------------------------------------|------------------------------------------|------------------------------------------------------------------------------------------------------------------|-----------------------------------------------------------------------------|
| Artificialised areas                     |                                          |                                                                                                                  | Artificialised areas                                                        |
| Agricultural Areas                       | Arable land                              | Non-irrigated arable land<br>Permanently irrigated land<br>Rice fields (n.a.)                                    | Temporary crops                                                             |
|                                          | Permanent crops                          | Vineyards<br>Orchards<br>Olive groves                                                                            | Permanent crops                                                             |
|                                          | Heterogeneous agricultural areas         | Arable land with permanent crops<br>Complex cultural systems<br>Agriculture with natural and semi-natural spaces | Multiple agrosilvopastoral use                                              |
|                                          | Protected agriculture and greenhouses    | Protected agriculture and greenhouses                                                                            | Protected agriculture and greenhouses                                       |
|                                          | Pasture                                  | 3.1.1 Improved pastures<br>3.1.2 Spontaneous pastures                                                            | Pasture                                                                     |
| Agroforestry areas                       | Agroforestry areas                       | Agroforestry areas                                                                                               | Multiple agrosilvopastoral use                                              |
| Forests                                  | Forests                                  | Broad-leaved forests<br>Coniferous forests                                                                       | Forests, shrubs and vegetation                                              |
| Scrubs                                   | Scrubs                                   | Scrubs                                                                                                           |                                                                             |
| Open spaces with little or no vegetation | Open spaces with little or no vegetation | Beaches, dunes and sandbanks<br>Bare rock<br>Sparsely vegetation                                                 | Beaches, dunes and sandbanks<br>Bare rock<br>Forests, shrubs and vegetation |
| Wetlands                                 |                                          |                                                                                                                  | Wetlands                                                                    |
| Superficial water bodies                 |                                          |                                                                                                                  | Water bodies                                                                |

\* (n.a) – not applicable in the EDM

### 3. Mapping the potential foodshed relocation scenario

After identifying the ecologically suitable areas for agrarian land use, we proposed an additional forestry class for water and soil conservation (conservation forestry) to improve the relocation scenario by safeguarding forestry resources in the territory and associated ecosystem services. Table S1c. describes the assignment criteria for this land use class, determined to obtain the maximum potential for agrarian use.

**Table S1c.** Landscape planning for water and soil conservation forestry.

|                                      | Soil ecological value (ev) | Slope (%)    | Land morphology  |
|--------------------------------------|----------------------------|--------------|------------------|
|                                      | 1 to 5                     | 0 to 5 or >5 | Narrow hilltops* |
| Water and soil conservation forestry | 1                          | -            |                  |
|                                      | 2                          | >=16         | Hillslopes       |
|                                      | 3 to 5                     | >=45         |                  |

\* Narrow hilltops that simultaneously have slopes > 5% are not suitable for agriculture [5,6]; (Very low ev=1; Low ev=2; Variable ev=3; High ev=4; Very high ev=5).

Finally, complementary scenarios reflecting the ecologically suitable areas for each of the specific agrarian land uses (i.e., temporary crops, permanent crops, pastures and

multiple agrosilvopastoral use) were obtained. Overall, we depicted areas with existing agrarian use to be maintained and additional areas currently under different land uses to propose for agrarian use as shown in figure S1.a (a, b, c and d).

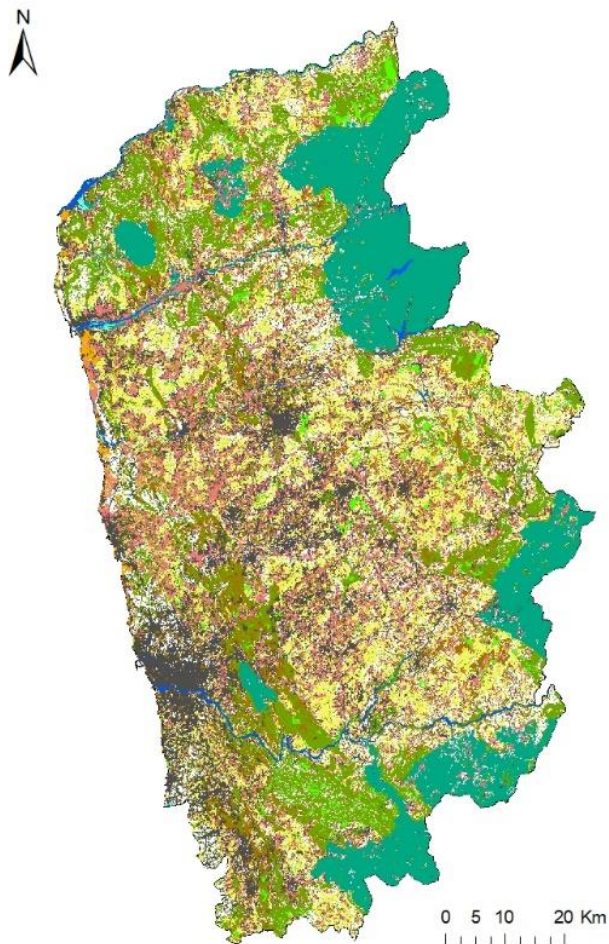

(a)

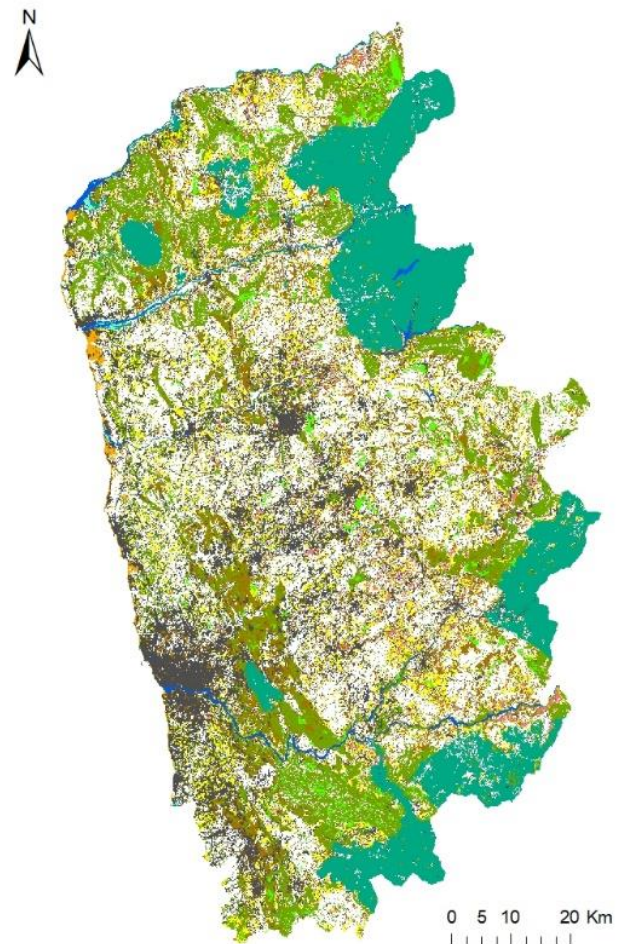

(b)

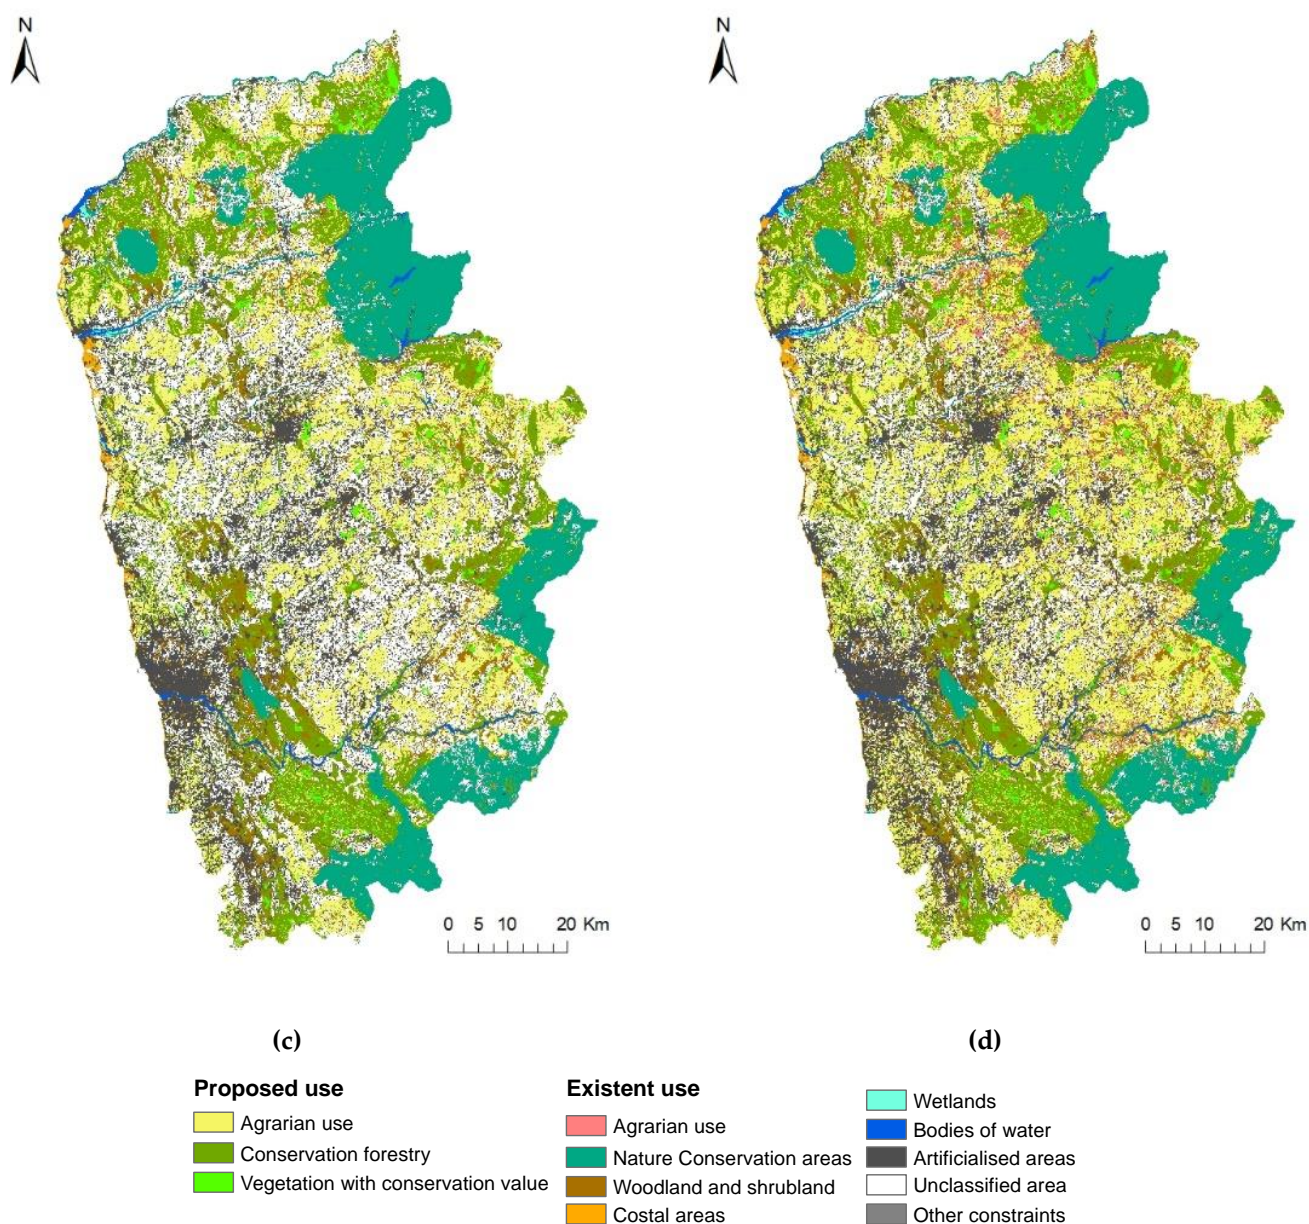

**Figure S1.a.** Foodshed relocation scenario maps regarding specific agrarian usages in the EDM: (a) temporary crops; (b) permanent crops; (c) pastures; (d) multiple agrosilvopastoral use.

For the methodology presented, we employed spatial tools and approaches in Geographic Information Systems (ArcGIS 10.7) [7]. The cartographic datasets used (Table S1.d) are from the EPIC WEBGIS PORTUGAL platform; from DGT (Direcção-Geral do Território), namely, the 2019 version of the Official Administrative Map of Portugal (CAOP)[8]; and the thematic map of land use and land cover for mainland Portugal for 2018 (COS2018) [9].

**Table S1.d.** Database complete list.

| Title                                                                                                 | Location                                                                                                                                                  | Coordinate system                  | Scale     | Spatial resolution | Reference |
|-------------------------------------------------------------------------------------------------------|-----------------------------------------------------------------------------------------------------------------------------------------------------------|------------------------------------|-----------|--------------------|-----------|
| <b>Official Administrative Map of Portugal (CAOP)</b>                                                 | <a href="https://www.dgterritorio.gov.pt/cartografia/cartografia-tematica/caop">https://www.dgterritorio.gov.pt/cartografia/cartografia-tematica/caop</a> | ETRS89/PT-TM06                     | 1:25 000  |                    | [8]       |
| <b>Land use and land cover map for mainland Portugal for 2018 (COS2018).</b>                          | <a href="https://www.dgterritorio.gov.pt/cartografia/cartografia-tematica/">https://www.dgterritorio.gov.pt/cartografia/cartografia-tematica/</a>         | ETRS89/PT-TM06                     | 1:25 000  | 25 meters          | [9]       |
| <b>Terrain morphology</b>                                                                             | <a href="http://epic-webgis-portugal.isa.ulisboa.pt/">http://epic-webgis-portugal.isa.ulisboa.pt/</a>                                                     | ETRS89 / Portugal TM06 (EPSG:3763) | 1:100 000 | meters             | [3]       |
| <b>Slope</b>                                                                                          | <a href="http://epic-webgis-portugal.isa.ulisboa.pt/">http://epic-webgis-portugal.isa.ulisboa.pt/</a>                                                     | ETRS89 / Portugal TM06 (EPSG:3763) |           | 25 meters          | [4]       |
| <b>Soil depth</b>                                                                                     | <a href="http://epic-webgis-portugal.isa.ulisboa.pt/">http://epic-webgis-portugal.isa.ulisboa.pt/</a>                                                     | ETRS89 / Portugal TM06 (EPSG:3763) | 1:50 000  | meters             | [10]      |
| <b>Soil ecological value</b>                                                                          | <a href="http://epic-webgis-portugal.isa.ulisboa.pt/">http://epic-webgis-portugal.isa.ulisboa.pt/</a>                                                     | ETRS89 / Portugal TM06 (EPSG:3763) | 1:50 000  | meters             | [2]       |
| <b>Coastal areas</b>                                                                                  | <a href="http://epic-webgis-portugal.isa.ulisboa.pt/">http://epic-webgis-portugal.isa.ulisboa.pt/</a>                                                     | ETRS89 / Portugal TM06 (EPSG:3763) |           | meters             | [11]      |
| <b>Natural and semi-natural vegetation from moderate to very high conservation value</b>              | <a href="http://epic-webgis-portugal.isa.ulisboa.pt/">http://epic-webgis-portugal.isa.ulisboa.pt/</a>                                                     |                                    | 1:100 000 | meters             | [12]      |
| <b>Rede Fundamental de Conservação da Natureza (RFCN) the National System Classified Areas (NSCA)</b> |                                                                                                                                                           |                                    |           |                    |           |
| <b>National Network of Protected Areas</b>                                                            | <a href="http://epic-webgis-portugal.isa.ulisboa.pt/">http://epic-webgis-portugal.isa.ulisboa.pt/</a>                                                     | ETRS89 / Portugal TM06 (EPSG:3763) | 1:25000   | meters             | [13]      |
| <b>IBAs</b>                                                                                           |                                                                                                                                                           |                                    |           |                    | [14]      |
| <b>Council of Europe Biogenetic Reserve</b>                                                           |                                                                                                                                                           |                                    |           |                    | [15]      |
| <b>UNESCO Biosphere Reserve</b>                                                                       |                                                                                                                                                           |                                    |           |                    | [16]      |
| <b>Ramsar Convention</b>                                                                              |                                                                                                                                                           |                                    |           |                    | [17]      |
| <b>Natura 2000 Network – Sites of Community Importance - (SCI's)</b>                                  |                                                                                                                                                           |                                    |           |                    | [18]      |
| <b>Natura 2000 Network – Special Protection Areas - (SPA's),</b>                                      |                                                                                                                                                           |                                    |           |                    | [19]      |
| <b>HNVf type 1 and 2</b>                                                                              | <a href="https://doi.org/10.1016/j.landurbplan.2019.103726">https://doi.org/10.1016/j.landurbplan.2019.103726</a>                                         |                                    |           |                    | [20]      |

## References

- Cardoso AS, Domingos T, de Magalhães MR, de Melo-Abreu J, Palma J. Mapping the lisbon potential foodshed in ribatejo e oeste: A suitability and yield model for assessing the potential for localized food production. Sustainability (Switzerland). 2017 Nov 1;9(11).
- Leitão M, Cortez N, Pena SB. Valor Ecológico do Solo de Portugal Continental. [Internet]. LEAF/ISA/ULisboa. 2013 [cited 2022 Oct 27]. Available from: Available at: <http://epic-webgis-portugal.isa.utl.pt/>
- Cunha NS, Magalhães MR, Abreu MM. Morfologia do Terreno de Portugal Continental [Internet]. LEAF/ISA/ULisboa. 2013 [cited 2022 Oct 27]. Available from: Available at: <http://epic-webgis-portugal.isa.utl.pt/>
- LEAF (ex-CEAP). Declives de Portugal Continental. [Internet]. LEAF/ISA/ULisboa. 2013 [cited 2022 Oct 27]. Available from: Available at: <http://epic-webgis-portugal.isa.utl.pt/>

5. Cunha N, Magalhães MR, Abreu M, Abreu MC. Land Morphology. In: *Estrutura Ecológica Nacional Uma Proposta de Delimitação e Regulamentação*; Lisboa: SA Press ; 2013. p. 51–66.
6. Lopes AM, Saavedra A, Abreu JM e, Silva JF, Barata LT, Franco L, et al. Ordem ecológica e desenvolvimento. O futuro do território português. 2015 [cited 2022 Jan 12]; Available from: <https://bibliotecadigital.ipb.pt/handle/10198/17334>
7. ESRI. ArcGIS Desktop. Redlands: CA: Environmental Systems Research Institute.; 2012.
8. DGT. Carta Administrativa Oficial de Portugal - CAOP2019 [Internet]. DGT. DGT; 2019 [cited 2022 Oct 27]. Available from: <https://www.dgterritorio.gov.pt/cartografia/cartografia-tematica/caop>
9. DGT. Carta de Uso e Ocupação do Solo para 2018 - COS 2018. DGT. DGT; 2019.
10. Barata LT, Saavedra A, Cortez N, Varennes A. Cartografia da espessura efectiva dos solos de Portugal Continental. [Internet]. LEAF/ISA/ULisboa. 2015 [cited 2022 Oct 27]. Available from: Available at: <http://epic-webgis-portugal.isa.utl.pt/>
11. Silva JF, CNS, LAM, AMM, MMR. Litoral de Portugal Continental. [Internet]. LEAF/ISA/ULisboa. 2013 [cited 2022 Oct 27]. Available from: Available at: <http://epic-webgis-portugal.isa.utl.pt/data>
12. Mesquita S. Vegetação Natural e Semi-natural com Valor de Conservação em Portugal Continental. [Internet]. LEAF/ISA/ULisboa. 2013 [cited 2022 Oct 27]. Available from: Available at: <http://epic-webgis-portugal.isa.utl.pt/>
13. LEAF (ex-CEAP). Aferição da Rede Nacional de Áreas Protegidas publicadas pelo ICNF, ao CAOP. [Internet]. LEAF/ISA/ULisboa. 2011 [cited 2022 Oct 27]. Available from: Available at: <http://epic-webgis-portugal.isa.utl.pt/>
14. SPEA n. d. Áreas Importantes para Aves (IBAs) [Internet]. [cited 2022 Oct 27]. Available from: Available at: <http://epic-webgis-portugal.isa.utl.pt/>
15. LEAF (ex-CEAP). Aferição da Rede de Reservas Biogenéticas do Conselho da Europa em Portugal Continental, publicada pelo ICNF, ao CAOP. [Internet]. LEAF/ISA/ULisboa. . 2010 [cited 2022 Oct 27]. Available from: Available at: <http://epic-webgis-portugal.isa.utl.pt/>
16. LEAF (ex-CEAP). Aferição da Reserva da Biosfera publicada pelo ICNF, ao CAOP. [Internet]. LEAF/ISA/ULisboa. 2013 [cited 2022 Oct 27]. Available from: Available at: <http://epic-webgis-portugal.isa.utl.pt/>
17. LEAF (ex-CEAP). Aferição das áreas RAMSAR publicadas pelo ICNF, ao CAOP. [Internet]. LEAF/ISA/ULisboa. 2013 [cited 2022 Oct 27]. Available from: Available at: <http://epic-webgis-portugal.isa.utl.pt/>
18. LEAF (ex-CEAP). Aferição dos Sítios de Importância Comunitária publicados pelo ICNF, ao CAOP. [Internet]. LEAF/ISA/ULisboa. 2013 [cited 2022 Oct 27]. Available from: Available at: <http://epic-webgis-portugal.isa.utl.pt/>
19. LEAF (ex-CEAP). Aferição das Zonas de Protecção Especial publicadas pelo ICNF, ao CAOP. [Internet]. LEAF/ISA/ULisboa. 2013 [cited 2022 Oct 27]. Available from: Available at: <http://epic-webgis-portugal.isa.utl.pt/>
20. Lomba A, Buchadas A, Corbelle-Rico E, Jongman R, McCracken D. Detecting temporal changes in the extent of High Nature Value farmlands: The case-study of the Entre-Douro-e-Minho Region, Portugal. *Landsc Urban Plan*. 2020 Mar 1;195.
